# Supplementary material
Source: publisher figshare collection journal article supplement (https://acs.figshare.com/ndownloader/files/3726508)
Supplement: Supplementary file 1 [file 3726508]

## *Supporting Information*

### **Preparation and Characterization of Lignosulfonate-Acrylonitrile Copolymer as a Novel Carbon Fiber Precursor**

Keqiang Xia,<sup>a, b</sup> Qin Ouyang,<sup>\*a</sup> Yousi Chen,<sup>a</sup> Xuefei Wang,<sup>a</sup> Xin Qian,<sup>a</sup> and Li Wang<sup>b</sup>

a. National Engineering Laboratory for Carbon Fiber Preparation Technology, Ningbo  
Institute of Material Technology & Engineering, Chinese Academy of Sciences,

Ningbo 315201, P.R. China

b. College of Material Science and Chemical Engineering, Ningbo University, Ningbo  
315211, P.R. China

\* Corresponding Author: o\_yang@126.com, ouyangqin@nimte.ac.cn

#### **Contents:**

**Figure S1.** Photographs of LS, esterified LS, LS-AN copolymer

**Figure S2** FTIR spectra of LS/PAN homopolymer blends with different weight ratios

**Figure S3** Calibration plot of  $A_{1510\text{cm}^{-1}}/A_{2243\text{cm}^{-1}}$  against  $X_{\text{LS}}/X_{\text{PAN}}$

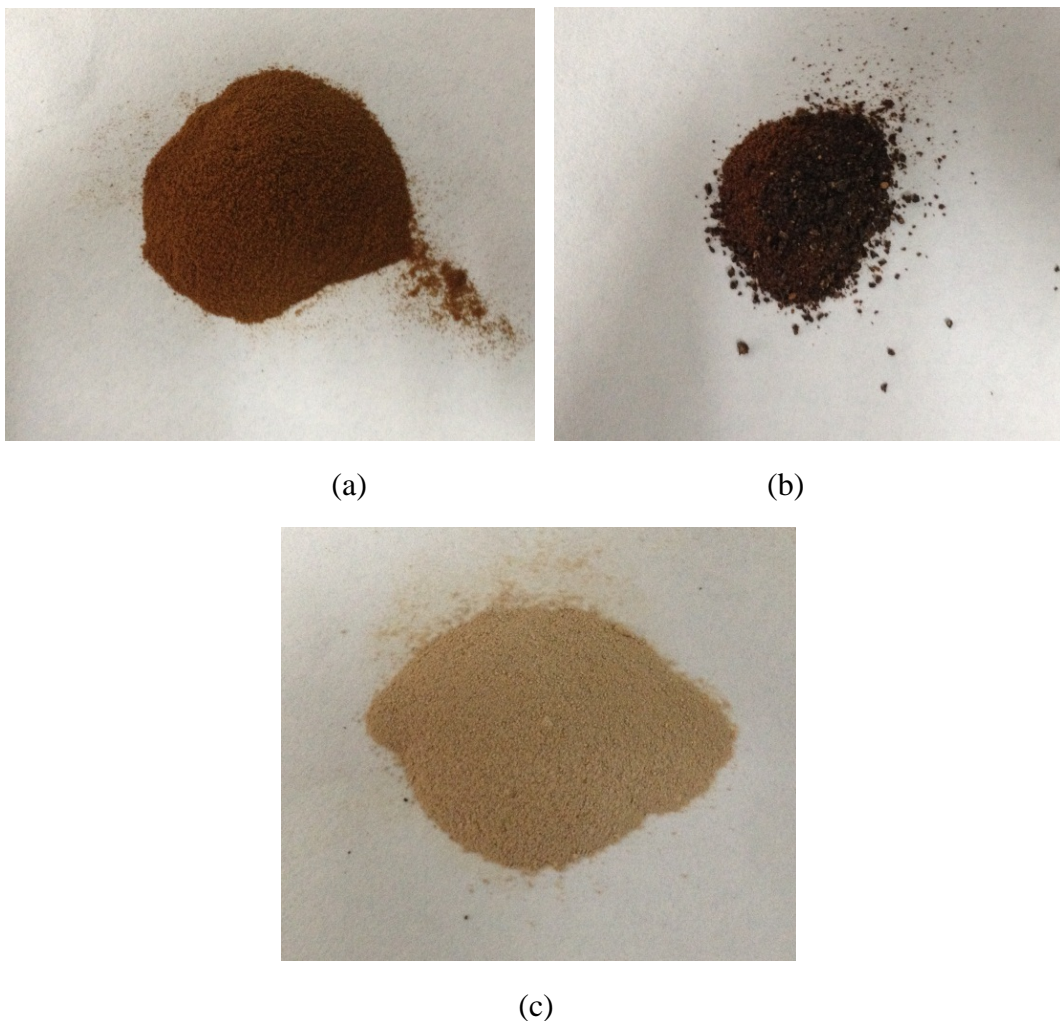

**Figure S1.** Photographs of (a) LS, (b) esterified LS, (c) LS-AN copolymer

For determining the relative content of LS in the copolymer, thin films of LS/PAN homopolymer blends with different given weight proportions were prepared for FTIR analysis to make the calibration plot. The method used was as follows: first, solutions consisting of about 10% of LS/PAN blends in DMSO were prepared, then thin films of the solutions were cast onto glass slices, finally they were dried at 60 °C under vacuum to remove DMSO, leaving thin films. **Figure S2** shows the FTIR spectra of LS/PAN homopolymer blends with different given weight proportions. With the increasing of LS content in the blends, the absorption peak at 1510  $\text{cm}^{-1}$  gradually increases, while the absorption peak at 2243  $\text{cm}^{-1}$  decreases accordingly. A linear plot of  $A_{1510\text{cm}^{-1}}/A_{2243\text{cm}^{-1}}$  against  $X_{\text{LS}}/X_{\text{PAN}}$  was obtained and shown in **Figure S3**.

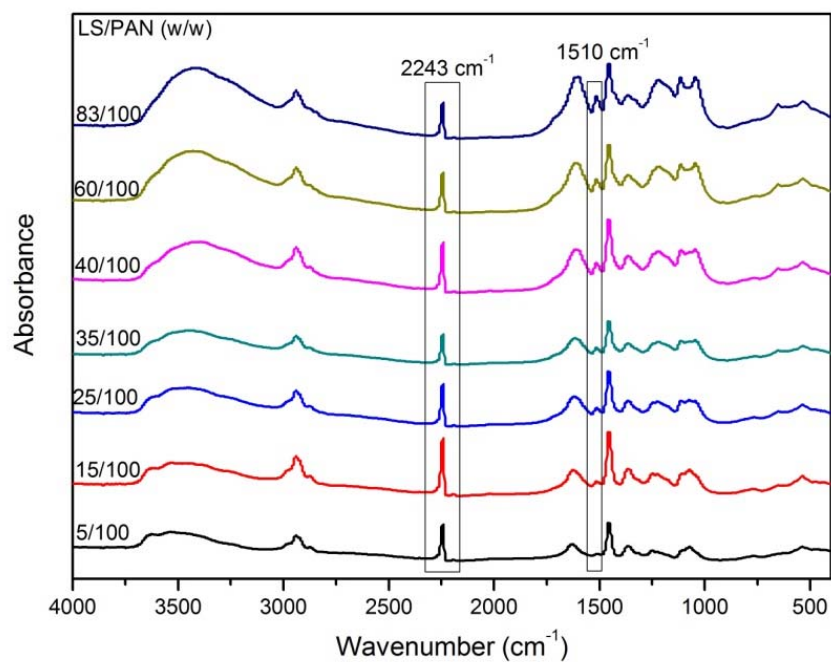

**Figure S2** FTIR spectra of LS/PAN homopolymer blends with different weight ratios

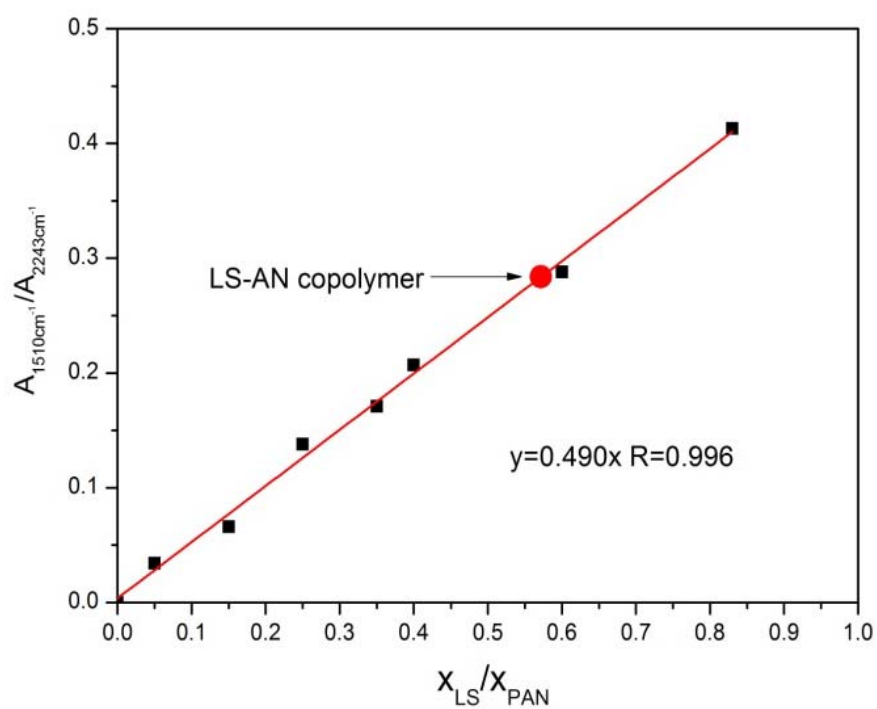

**Figure S3** Calibration plot of  $A_{1510\text{cm}^{-1}}/A_{2243\text{cm}^{-1}}$  against  $X_{\text{LS}}/X_{\text{PAN}}$
